# Supplementary material
Source: publisher figshare collection journal article supplement (https://gsajournals.figshare.com/ndownloader/files/23514863)
Supplement: Supplementary file 1 [file 23514863]

## Sheet: pd141_primers_final
Table S3. Diagnostic PCR primers for the CeMbio strains. All primers are designed to specifically amplify only a single CeMbio strain (Figure S2).
Strain ID	Primer name	Forward primer	Reverse primer	Tm	Size	Target gene
BIGb0170	BIGb0170_1_F/R	CGTACTGATCGATCCGGCAA	GCGTTTTCGTCGACATACCG	60°C	215	JLKFHDAP_03775 TonB-dependent receptor SusC
BIGb0172	BIGb0172_1_F/R	GACATCAGCAACGATGACGC	CGGTAAAAACGCCGCATAGG	60°C	243	MFNJPLEI_01895 hypothetical protein
BIGb0393	BIGb0393_1_F/R	GCAACTTCTATTCGCCAGCG	CGCGGTTCGAAACGTACATC	60°C	223	JNLLABFM_02616 hypothetical protein
CEent1	CEent1_2_F/R	CGGGGCCGATATCAACATGA	CGTTTTCGCATCGTCGGTAC	60°C	202	AKANDPBF_02309 Fatty acid oxidation complex subunit alpha
JUb19	JUb19_2_F/R	GCAACGACGAAGCGAAGATC	CGTCGTCGAAGTAGTAGCCC	60°C	243	OOGEHLIF_01080 Neutral endopeptidase
JUb44	JUb44_1_F/R	CTCAAACGGTTGCTTTCGCA	CGAAAACCGCTCCTGCAAAA	60°C	228	OKLOAHLE_03721 Cobalt-zinc-cadmium resistance protein CzcA
JUb66	JUb66_1_F/R	CGTATCACCTGGCGCATTTG	ATTCGCAGCATCAACATCGC	60°C	211	IOCNDGOA_01392 Outer membrane usher protein FimD
JUb134	JUb134_10_F/R	TACATCGGCAACCAAGCTGT	CATAGTTCGAAAGCCGCGTG	60°C	208	OJBCCNNM_01336 Fe(3+)-pyochelin receptor
MSPm1	MYb10_1_F/R	CTATCGGTTTGCGCTTGCTC	GATGAACGCCTCGTGAATGC	60°C	230	NODGOLDA_04927 hypothetical protein
MYb10	MYb11_1_F/R	AGCAAACGCGCACAAGAATT	GTTGCAATCGACTCCGCATC	60°C	239	HMKJCHIL_01922 hypothetical protein
MYb11	MYb71_1_F/R	GCGCGCTGTTTATCCTTGAG	CAGCTCATAAAACGTCGGCG	60°C	245	IFLGCHGO_01081 putative TonB-dependent receptor
MYb71	MSPm1_1_F/R	CTCGATGCATATGCGCGATG	GCAAACGATAGAGTGCAGCG	60°C	203	GBFCDPHL_00949 1-deoxy-D-xylulose-5-phosphate synthase
Forward primer, reverse primer: Sequence of the forward and reverse primers in 5’ - 3’ direction. Tm: Melting temperature. Size: Size of the amplicon in base pairs. Target gene: Prokka annotation of the gene targeted by the primers.
